# Supplementary material for: A systematic review to investigate the measurement properties of goal attainment scaling, towards use in drug trials
Source: PubMed Central journal article supplement (PMC4989379; doi:10.1186/s12874-016-0205-4), 2016-08-17
Supplement: 12874_2016_205_MOESM1_ESM.pdf [file 12874_2016_205_MOESM1_ESM.pdf]

## **GAS search**

### **Medline**

#### *Search terms*

- 1 (goal? adj (set or setting or attainment or scale\$ or scaling)).ti,ab,kw.
- 2 Self Care/
- 3 self-care.ti,ab.
- 4 self-set.ti,ab.
- 5 self-assigned.ti,ab.
- 6 (individual adj3 goal\$).ti,ab.
- 7 goals/
- 8 goal\$.ti,ab.
- 9 7 or 8
- 10 2 or 3 or 4 or 5
- 11 9 and 10
- 12 1 or 6 or 11
- 13 randomized controlled trial.pt.
- 14 controlled clinical trial.pt.
- 15 randomized.ab.
- 16 placebo.ab.
- 17 drug therapy.fs.
- 18 drug therapy.fs.
- 19 trial.ab.
- 20 groups.ab.
- 21 Epidemiologic studies/
- 22 exp case control studies/
- 23 exp cohort studies/
- 24 Case control.tw.
- 25 (cohort adj (study or studies)).tw.
- 26 (cohort adj (study or studies)).tw.
- 27 (cohort adj (study or studies)).tw.
- 28 (observational adj (study or studies)).tw.
- 29 Longitudinal.tw.
- 30 Retrospective.tw.
- 31 Cross sectional.tw.
- 32 Cross-sectional studies/
- 33 or/13-32
- 34 12 and 33
- 35 (individual\* adj5 goal\$).ti,ab.
- 36 33 and 35
- 37 34 or 36

### **Embase**

### *Search terms*

- 1 (goal? adj (set or setting or attainment or scale\$ or scaling)).ti,ab,kw.
- 2 exp \*self care/
- 3 self-care.ti,ab.
- 4 self-set.ti,ab.
- 5 self-assigned.ti,ab.
- 6 (individual\$ adj5 goal\$).ti,ab.
- 7 exp \*motivation/
- 8 goal\$.ti,ab.
- 9 7 or 8
- 10 2 or 3 or 4 or 5
- 11 9 and 10
- 12 1 or 6 or 11  
crossover procedure/ or double-blind procedure/ or single-blind procedure/ or randomized  
controlled trial/ or crossover\$.ti,ab,ot. or cross over\$.ti,ab,ot. or placebo\$.ti,ab,ot. or (doubl\$  
adj blind\$).ti,ab,ot. or allocat\$.ti,ab,ot. or random\$.ti,ab,ab. or trial\$.ti.
- 13
- 14 \*Clinical study/
- 15 \*Case control study/
- 16 \*Family study/
- 17 \*Longitudinal study/
- 18 \*Retrospective study/
- 19 \*Prospective study/
- 20 \*Cohort analysis/
- 21 (Cohort adj (study or studies)).mp.
- 22 (Case control adj (study or studies)).tw.
- 23 (follow up adj (study or studies)).tw.
- 24 (observational adj (study or studies)).tw.
- 25 (epidemiologic\$ adj (study or studies)).tw.
- 26 (cross sectional adj (study or studies)).tw.
- 27 or/13-26
- 28 12 and 27
- 29 limit 28 to (conference abstract or conference proceeding)
- 30 28 not 29

## **PsycINFO**

### *Search terms*

- 1 (goal? adj (set or setting or attainment or scale\$ or scaling)).ti,ab,tm.
- 2 exp Self Management/
- 3 self-care.ti,ab.
- 4 self-set.ti,ab.
- 5 self-assigned.ti,ab.
- 6 (individual\$ adj5 goal\$).ti,ab.
- 7 exp Goals/
- 8 goal\$.ti,ab.

- 9 7 or 8
- 10 2 or 3 or 4 or 5
- 11 9 and 10
- 12 1 or 6 or 11  
((case\* adj5 control\*) or (case adj3 comparison\*) or case-comparison or control
- 13 group\*).ti,ab,id. not "Literature Review".md.  
((cohort or longitudinal or prospective or retrospective).ti,ab,id. or longitudinal study.md. or
- 14 prospective study.md. or retrospective study.md.) not "Literature Review".md.
- 15 (cross section\* or "prevalence study").ti,ab,id.  
clinical trials/ or "treatment outcome clinical trial".md. or ((randomi?ed adj7 trial\*) or  
((single or doubl\* or tripl\* or treb\*) and (blind\* or mask\*)) or (controlled adj3 trial\*) or
- 16 (clinical adj2 trial\*).ti,ab,id.
- 17 13 or 14 or 15 or 16
- 18 12 and 17
- 19 limit 18 to peer reviewed journal
